# Supplementary material for: Preparation of Magnetic MIL-68(Ga) Metal–Organic Framework and Heavy Metal Ion Removal Application
Source: MDPI journal article supplement (doi:10.3390/molecules27113443), 2022-05-26
Supplement: s1 [file s1]

# Preparation of magnetic MIL-68(Ga) metal-organic framework and heavy metal ion removal application

**Youjun Zhang**<sup>1,3</sup>, **Licong Liu**<sup>4</sup>, **Dixiong Yu**<sup>2</sup>, **Jinglan Liu**<sup>3</sup>, **Lin Zhao**<sup>3</sup>, **Jinpeng Liu**<sup>5</sup>, and **Shuo Liu**<sup>2,5\*</sup>

<sup>1</sup> School of Environmental Science and Engineering, Tianjin University, 92, Weijin Rd., Nankai District, 300350, China; zhangyoujun001@126.com

<sup>2</sup> Key Laboratory of Molecular Microbiology and Technology, Ministry of Education, Department of Microbiology, College of Life Sciences, Nankai University, Tianjin 300071, China

<sup>3</sup> Tianjin North China Geological Exploration Bureau, 67, Guang-rui-xi-lu Rd., Tianjin, 300170, China

<sup>4</sup> Technical Centre of Solid Waste and Soil Ecology of Inner Mongolia, Teng-fei Rd., Huhehaote, 010000, China

<sup>5</sup> College of Environmental Science and Engineering, Tianjin Key Laboratory of Environmental Remediation and Pollution Control, Nankai University, 38 Tongyan Rd., Tianjin 300350, P. R. China

\* Correspondence: liushuo@nankai.edu.cn

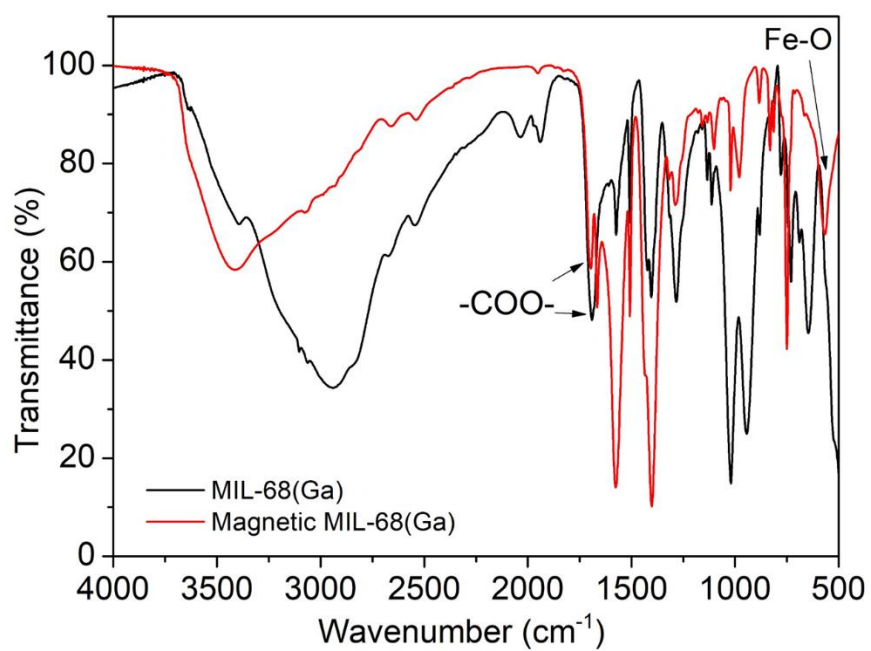

**Figure S1.** FT-IR spectrum of MIL-68(Ga) and magnetic MIL-68(Ga).

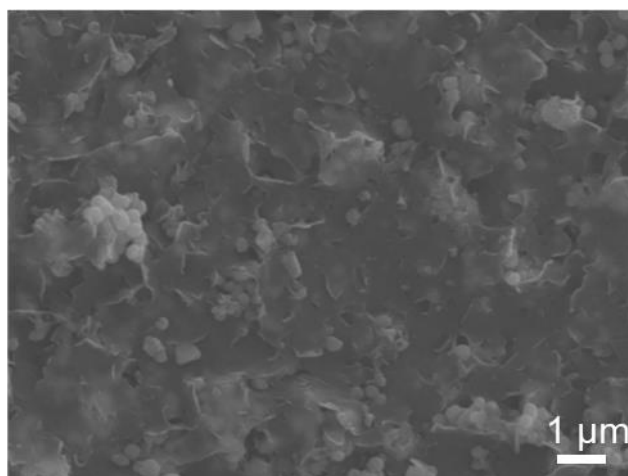

**Figure S2.** SEM images of magnetic MIL-68(Ga) after incubation in acidic solution (pH = 5) for 30 min.

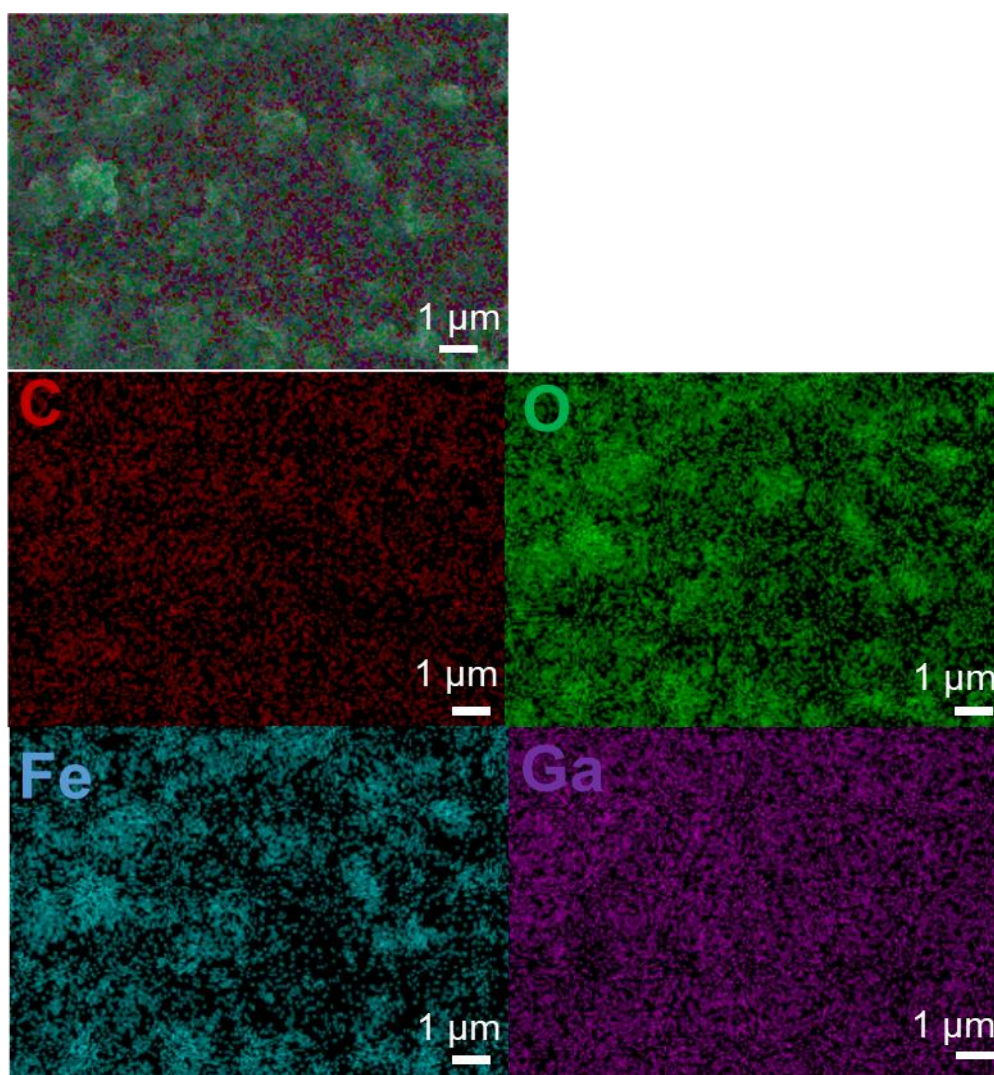

**Figure S3.** EDS mapping images of magnetic MIL-68(Ga) after incubation in acidic solution (pH = 5) for 30 min.

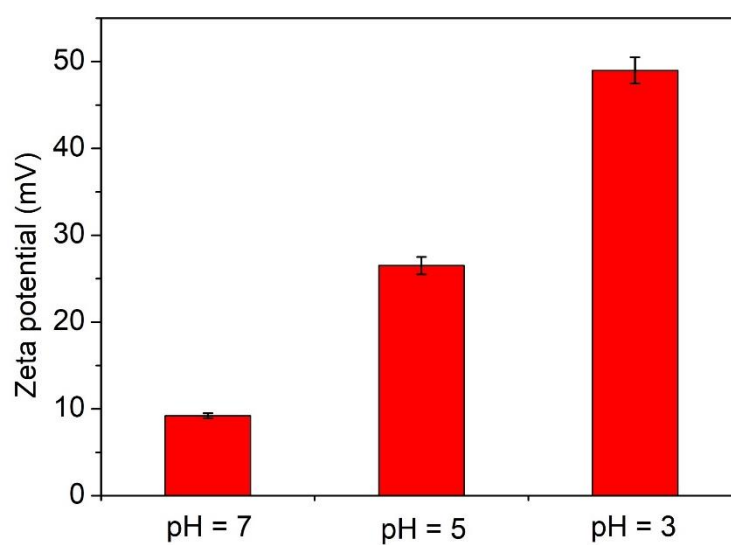

**Figure S4.** Effect of pH on the zeta potential of magnetic MIL-68(Ga).

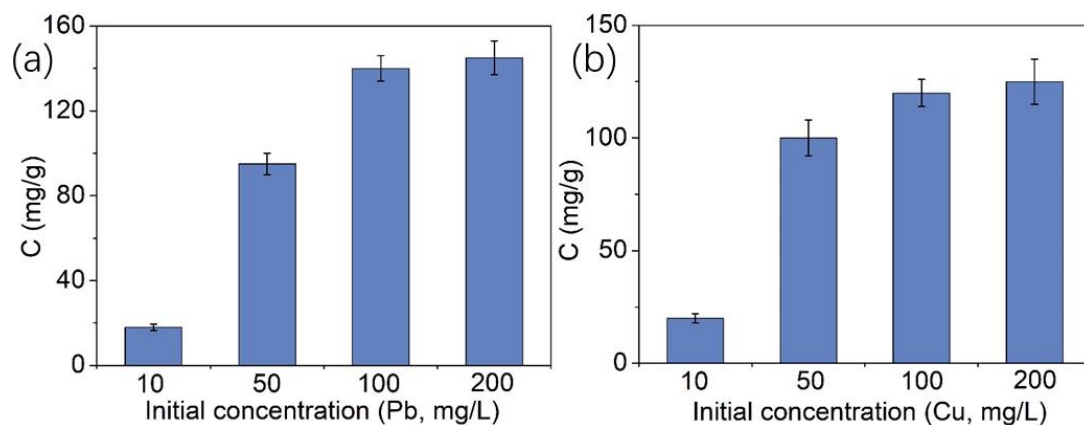

**Figure S5.** Adsorption capacity of MIL-68(Ga) on  $Pb^{2+}$  (a) and  $Cu^{2+}$  (b). (50 mg/L of metal ions, 200 mg/mL of adsorbent, 1 mL solution, pH = 7, room temperature, 30 min of incubation time).

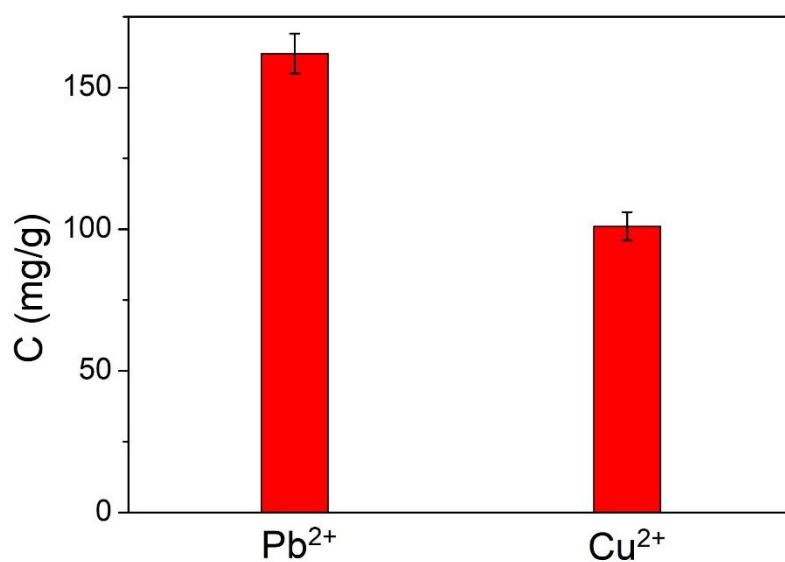

**Figure S6.** Adsorption capacity of MIL-68(Ga) in the mixture of  $Pb^{2+}$  and  $Cu^{2+}$  (100 mg/L of  $Pb^{2+}$  and  $Cu^{2+}$ , 200 mg/mL of adsorbent, 1 mL solution, pH = 7, room temperature, 30 min of incubation time).

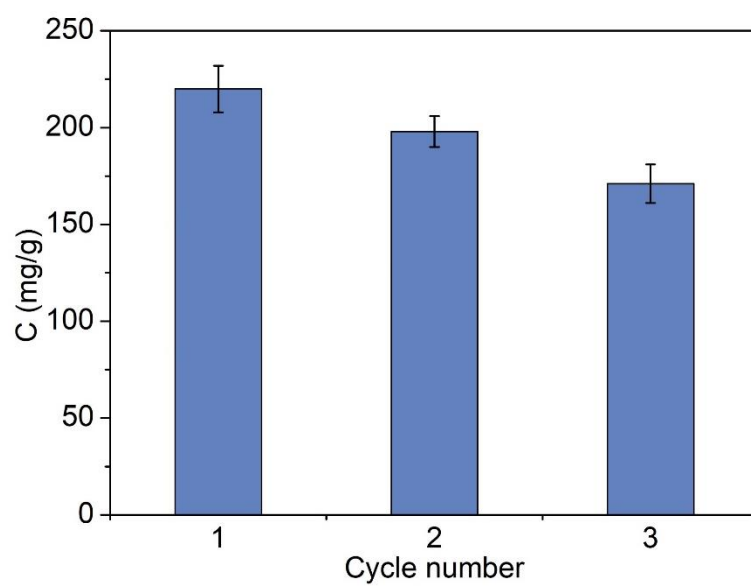

**Figure S7.** Reusability evaluation of magnetic MIL-68(Ga) (50 mg/L of metal ions, 200 mg/mL of adsorbent, 1 mL solution, pH = 7, room temperature, 30 min of incubation time).
